# Supplementary material for: A Protein Inventory of Human Ribosome Biogenesis Reveals an Essential Function of Exportin 5 in 60S Subunit Export
Source: PLoS Biol. 2010 Oct 26;8(10):e1000522. doi: 10.1371/journal.pbio.1000522 (PMC2964341; doi:10.1371/journal.pbio.1000522)
Supplement: Table S5 — Phenotypic classification of targets with respect to different nuclear 40S biogenesis defects based on nucleolar or nucleoplasmic accumulation of Rps2-YFP. The average ratio of “nucleoplasmic” to all hit-classified cells (sum of “nucleolar” and “nucleoplasmic” classified cells) for the two siRNAs with the highest hit rates is given for each target in the Rps2-YFP screen. A low value (approaching zero) indicates a nucleolar accumulation of the reporter, whereas a high value (approaching one) indicates a nucleoplasmic accumulation of the reporter. As a measure for the quality of this classification, the difference between the two scoring siRNAs is also given. (0.02 MB XLS) [file pbio.1000522.s013.xls]

## Sheet: Sheet1
Rps2-YFP hits ordered from nucleoar to nucleoplasmic
(2 siRNAs with highest rank)
Gene	ratio nucleoplasmic/total hit classified cells	difference of ratio of 2 oligos
UTP11L	0.005	0.01
FBL	0.0058595	0.011719
WDR36	0.0070205	0.002579
IMP4	0.007194	0.014388
NOL5A	0.007987	0.006884
RPS9	0.009489	0.00063
WDSOF1	0.0110065	0.022013
ESF1	0.011361	0.010064
CIRH1A	0.0116115	0.013273
PWP2	0.011882	0.017292
DDX10	0.012275	0.000928
RRP12	0.0124	0.017528
NOP5/NOP58	0.013465	0.008912
RPS13	0.013503	0.000516
NOLA1	0.014636	0.012178
UTP3	0.01634	0.03268
HUWE1	0.0170735	0.001889
RPS28	0.019879	0.014006
UTP6	0.0201885	0.011051
WBSCR22	0.021574	0.02662
UTP18	0.0218365	0.008275
RRP9	0.0221855	0.002413
RPS6	0.0222555	0.010177
RPS4X	0.0225365	0.000381
KRR1	0.023676	0.00084
FCF1	0.0238595	0.001361
RPS8	0.024952	0.00892
PNO1 (DIM2)	0.0256505	0.026911
TBL3	0.028241	0.026852
IMP3	0.0284765	0.037535
WDR46	0.029171	0.007386
RPL35	0.029393	0.005214
RPS12	0.029979	0.036428
DHX37	0.0306675	0.051025
RPLP0	0.031052	0.005924
RPS5	0.031082	0.00377
NOC4L	0.03125	0.0125
RPS3	0.032282	0.014384
RPLP2	0.0335685	0.010533
RPS3A	0.0382125	0.058407
PDCD11	0.0382385	0.004109
NOL14	0.0401345	0.060757
RPS21	0.040209	0.0152
RPS7	0.04303	0.059394
BMS1	0.0444275	0.019673
RPS10	0.0448995	0.064047
MPHOSPH10	0.050093	0.094504
RPS20	0.054557	0.03219
RPL35A	0.0553465	0.014307
RPS15	0.055792	0.06714
AATF	0.057887	0.068436
RBM19	0.0711955	0.131581
RPL7	0.073404	0.032054
RCL1	0.0783695	0.133117
RPLP1	0.0826945	0.003625
RPL31	0.0911745	0.018607
ABCE1	0.096226	0.012676
EIF3B	0.114653	0.125532
RPL6	0.120302	0.020266
EIF2S2	0.120881	0.166004
EIF3I	0.120942	0.008117
EIF4A3	0.122449	0.040816
RPL7A	0.143365	0.10931
RPS24	0.144816	0.235368
RPL9	0.151603	0.123025
RPL3	0.152567	0.010656
RPL27	0.17	0.04
RPL37A	0.17668	0.001249
RPL36	0.177957	0.289248
RPL36A	0.182738	0.108597
NOL6	0.199685	0.32063
DHX15	0.211384	0.15991
FAU	0.216426	0.133582
RPL30	0.225	0.13
RPS16	0.232064	0.349432
RPL38	0.25768	0.162418
GRWD1	0.263431	0.457095
RPL18	0.284489	0.092787
NGDN	0.288037	0.18583
RPS11	0.293244	0.54784
RPL21	0.3	0.064367
RPS17	0.31652	0.200293
RPL11	0.322669	0.058181
RPL19	0.325	0.108225
RRN3	0.335544	0.604422
RPL18A	0.351971	0.254962
RPS27A	0.355	0.01
RPL27A	0.358289	0.010695
RAE1	0.366301	0.075797
GLE1	0.371629	0.116647
RPL8	0.397378	0.261423
XPO1 (CRM1)	0.406592	0.03899
RPS26	0.416986	0.057501
DDX18	0.41761	0.703241
C14orf21	0.41944	0.06695
RPL5	0.439754	0.019042
NUP107	0.550226	0.067117
AAMP	0.574335	0.362957
PSMA4	0.581421	0.398135
NUP153	0.606504	0.485736
RPL10	0.61897	0.686588
RPL24	0.625	0.1
NUP93	0.665359	0.30369
RPL39	0.706516	0.154968
NUP160	0.711112	0.088889
NUP205	0.716499	0.175512
NUP214	0.750545	0.077223
SEC13	0.803262	0.035095
NUP62	0.808048	0.08325
NUP88	0.835495	0.078263
NUP98	0.850855	0.013499
NUTF2	0.857447	0.114894
NUP155	0.877561	0.11776
NUP50	0.877561	0.11776
NUPL1	0.913356	0.003796
PABPC1	0.931278	0.002612
NUP54	0.937827	0.052124
